# Supplementary material for: Fault Activity in Clay Rock Site Candidate of High Level Radioactive Waste Repository, Tamusu, Inner Mongolia
Source: MDPI journal article supplement (doi:10.3390/min11090941), 2021-08-29
Supplement: s1 [file s1]

# Fault Activity in Clay Rock Site Candidate of High Level Radioactive Waste Repository, Tamusu, Inner Mongolia

Zheng Rao <sup>1</sup>, Guangrong Li <sup>1,\*</sup>, Xiaodong Liu <sup>1,2</sup>, Pinghui Liu <sup>1</sup>, Honghui Li <sup>3</sup>, Shuai Liu <sup>1</sup>, Minqiang Zhu <sup>1</sup>, Chao Guo <sup>1</sup>, Fengjuan Ni <sup>1</sup>, Zhijun Gong <sup>1</sup> and Fiaz Asghar <sup>1</sup>

<sup>1</sup> State Key Laboratory of Nuclear Resources and Environment, East China University of Technology, Nanchang 330013, China; 201800818014@ecut.edu.cn (Z.R.); 198260003@ecut.edu.cn (X.L.); 199560031@ecut.edu.cn (P.L.); 200360016@ecut.edu.cn (S.L.); Zhumq@ecut.edu.cn (M.Z.); 2016070945@ecut.edu.cn (C.G.); 202062003@ecut.edu.cn (F.N.); 201660006@ecut.edu.cn (Z.G.); L2017008103@ecut.edu.cn (F.A.)

<sup>2</sup> Jiujiang University, Jiujiang 332005, China

<sup>3</sup> China Institute for Radiation Protection, Taiyuan, Shanxi 030006, China; lihonghui@cirp.org.cn

\* Correspondence: liguangrong0086@ecut.edu.cn



|                |         |                       |                              |              |
|----------------|---------|-----------------------|------------------------------|--------------|
| F <sub>4</sub> | TMS08   | Hanging wall of fault | Grey medium coarse sandstone | E 103°43'45" |
|                | TMS09-1 | Fault zone            | Ash black fault gouge        | N 40°39'28"  |
|                | TMS09-2 | Hanging wall of fault | Ash black cloy rock          | E 103°32'5"  |

**Table S2.** Major element content in fault gouge and host rock.

| Fracture Name                   | F <sub>2</sub> |           | F <sub>7</sub> |           |             |             |           | F <sub>4</sub> |           |
|---------------------------------|----------------|-----------|----------------|-----------|-------------|-------------|-----------|----------------|-----------|
| Sample Number                   | TMS01          | TMS02     | TMS04          | TMS05     | TMS06       | TMS07       | TMS08     | TMS09-1        | TMS09-2   |
| Lithology                       | Fault Gouge    | Host Rock | Fault Gouge    | Host Rock | Fault Gouge | Fault Gouge | Host Rock | Fault Gouge    | Host Rock |
| Al <sub>2</sub> O <sub>3</sub>  | 14.22          | 11.02     | 11.78          | 16.45     | 13.02       | 14.07       | 13.64     | 9.58           | 12.83     |
| BaO                             | 0.06           | 0.07      | 0.02           | 0.02      | 0.02        | 0.02        | 0.02      | 0.15           | 0.03      |
| CaO                             | 0.63           | 0.63      | 3.15           | 2.55      | 8.93        | 8.10        | 8.59      | 19.00          | 12.00     |
| Cr <sub>2</sub> O <sub>3</sub>  | <0.01          | <0.01     | <0.01          | <0.01     | 0.02        | <0.01       | <0.01     | <0.01          | <0.01     |
| TFe <sub>2</sub> O <sub>3</sub> | 2.47           | 0.52      | 2.31           | 9.70      | 7.22        | 8.26        | 9.75      | 7.57           | 5.08      |
| K <sub>2</sub> O                | 5.61           | 5.23      | 2.11           | 0.86      | 0.88        | 1.06        | 0.33      | 2.05           | 2.91      |
| MgO                             | 0.39           | 0.04      | 1.14           | 3.93      | 4.81        | 3.71        | 3.60      | 5.24           | 6.09      |
| MnO                             | 0.01           | 0.01      | 0.06           | 0.17      | 0.14        | 0.17        | 0.15      | 0.17           | 0.13      |
| Na <sub>2</sub> O               | 2.70           | 2.04      | 2.32           | 4.67      | 1.77        | 3.04        | 3.27      | 2.60           | 3.46      |
| P <sub>2</sub> O <sub>5</sub>   | 0.14           | 0.05      | 0.07           | 0.21      | 0.20        | 0.21        | 0.21      | 0.14           | 0.23      |
| SiO <sub>2</sub>                | 71.20          | 79.43     | 72.87          | 55.63     | 52.85       | 50.80       | 50.86     | 29.24          | 38.11     |
| SO <sub>3</sub>                 | 0.07           | 0.10      | <0.01          | <0.01     | <0.01       | 0.01        | <0.01     | 7.44           | 1.54      |
| SrO                             | 0.09           | 0.05      | 0.03           | 0.04      | 0.04        | 0.04        | 0.04      | 0.53           | 0.11      |
| TiO <sub>2</sub>                | 0.50           | 0.20      | 0.33           | 1.31      | 1.04        | 1.23        | 1.34      | 0.43           | 0.57      |
| Loss on ignition                | 1.60           | 0.91      | 3.20           | 3.74      | 9.32        | 9.17        | 7.81      | 17.33          | 16.75     |

**Table S3.** carbon and oxygen isotope compositions of fault gouge and host rock.

| Fracture Name  | Sample Number | Lithology   | δ <sup>13</sup> C <sub>PDB</sub> (‰) | δ <sup>18</sup> O <sub>SMOW</sub> (‰) |
|----------------|---------------|-------------|--------------------------------------|---------------------------------------|
| F <sub>2</sub> | TMS01         | Fault gouge | Low carbonate content                |                                       |
|                | TMS02         | Host rock   | -7.9                                 | 18.2                                  |
| F <sub>7</sub> | TMS04         | Fault gouge | -3.3                                 | 9.0                                   |
|                | TMS05         | Host rock   | -4.1                                 | 13.7                                  |
|                | TMS06         | Fault gouge | -4.8                                 | 10.7                                  |
|                | TMS07         | Fault gouge | -5.9                                 | 14.9                                  |
|                | TMS08         | Host rock   | -6.1                                 | 11.1                                  |
| F <sub>4</sub> | TMS09-1       | Fault gouge | -0.2                                 | 22.1                                  |
|                | TMS09-2       | Host rock   | 3.7                                  | 28.6                                  |

**Table S4.** Mossbauer parameters and relative contents of various iron species in fault samples from Tamusu area.

| Sample Number  | Types of Iron Ions | Lithology                                                                                      | Relative Content (%) | IS (mm/s)    | QS (mm/s)     | HW (mm/s)      | Hi (kOe)      | Fe <sup>2+</sup> /Fe <sup>3+</sup> |             |
|----------------|--------------------|------------------------------------------------------------------------------------------------|----------------------|--------------|---------------|----------------|---------------|------------------------------------|-------------|
| F <sub>2</sub> | TMS01              | para-Fe <sup>3+</sup><br>para-Fe <sup>3+</sup>                                                 | Fault gouge          | 45.00 ± 0.86 | 0.280 ± 0.140 | 0.520 ± 0.350  | 0.300 ± 0.210 |                                    |             |
|                |                    |                                                                                                |                      | 55.00 ± 0.87 | 0.420 ± 0.210 | 0.830 ± 0.330  | 0.372 ± 0.092 |                                    |             |
|                | TMS01<br>(77K)     | para-Fe <sup>3+</sup><br>para-Fe <sup>3+</sup><br>mag-Fe <sup>3+</sup><br>mag-Fe <sup>3+</sup> | Fault gouge          | 25.00 ± 0.59 | 0.382 ± 0.032 | 0.270 ± 0.340  | 0.350 ± 0.420 |                                    |             |
|                |                    |                                                                                                |                      | 21.00 ± 0.57 | 0.412 ± 0.058 | 0.910 ± 0.470  | 0.350 ± 0.250 |                                    |             |
|                |                    |                                                                                                |                      | 23.00 ± 0.29 | 0.590 ± 0.340 | 0.020 ± 0.380  | 0.400 ± 0.200 |                                    | 453.2 ± 4.1 |
|                |                    |                                                                                                |                      | 31.00 ± 0.28 | 0.370 ± 0.220 | -0.460 ± 0.220 | 0.350 ± 0.140 |                                    | 451.4 ± 2.6 |
|                | TMS02<br>(77K)     | para-Fe <sup>3+</sup><br>para-Fe <sup>3+</sup><br>mag-Fe <sup>3+</sup><br>mag-Fe <sup>3+</sup> | Host rock            | 24.00 ± 0.10 | 0.136 ± 0.081 | 0.560 ± 0.130  | 0.229 ± 0.093 |                                    |             |
|                |                    |                                                                                                |                      | 10.00 ± 0.13 | 0.650 ± 0.300 | 0.200 ± 0.130  | 0.340 ± 0.580 |                                    |             |
|                |                    |                                                                                                |                      | 34.00 ± 0.25 | 0.950 ± 0.200 | 0.000 ± 0.180  | 0.500 ± 0.340 |                                    | 465 ± 12    |
|                |                    |                                                                                                |                      | 32.00 ± 0.22 | 0.050 ± 0.160 | -0.560 ± 0.150 | 0.420 ± 0.270 |                                    | 459.2 ± 9.8 |
| F <sub>4</sub> | TMS09-1            | para-Fe <sup>2+</sup>                                                                          | Fault gouge          | 31.40 ± 0.30 | 1.097 ± 0.022 | 2.640 ± 0.043  | 0.237 ± 0.030 | 24.641                             |             |

|                |         |                       |             |              |               |               |               |        |
|----------------|---------|-----------------------|-------------|--------------|---------------|---------------|---------------|--------|
|                |         | pyr-Fe <sup>2+</sup>  |             | 64.70 ± 0.31 | 0.313 ± 0.008 | 0.614 ± 0.016 | 0.214 ± 0.013 |        |
|                |         | para-Fe <sup>3+</sup> |             | 3.90 ± 0.28  | 0.502 ± 0.076 | 1.280 ± 0.140 | 0.140 ± 0.110 |        |
|                | TMS09-2 | para-Fe <sup>2+</sup> | Host rock   | 41.60 ± 0.34 | 1.119 ± 0.015 | 2.559 ± 0.028 | 0.213 ± 0.021 |        |
|                |         | pyr-Fe <sup>2+</sup>  |             | 58.40 ± 0.32 | 0.332 ± 0.020 | 0.599 ± 0.031 | 0.305 ± 0.031 |        |
|                |         | para-Fe <sup>2+</sup> |             | 42.70 ± 0.38 | 1.144 ± 0.014 | 2.657 ± 0.028 | 0.167 ± 0.018 |        |
|                | TMS04   | para-Fe <sup>3+</sup> | Fault gouge | 28.40 ± 0.66 | 0.364 ± 0.023 | 2.030 ± 0.048 | 0.204 ± 0.043 | 0.7452 |
|                |         | para-Fe <sup>3+</sup> |             | 28.90 ± 0.76 | 0.232 ± 0.069 | 0.620 ± 0.013 | 0.330 ± 0.013 |        |
|                |         | para-Fe <sup>2+</sup> |             | 53.70 ± 0.17 | 1.131 ± 0.005 | 2.611 ± 0.010 | 0.164 ± 0.006 |        |
|                | TMS05   | para-Fe <sup>3+</sup> | Host rock   | 34.80 ± 0.32 | 0.306 ± 0.025 | 0.753 ± 0.052 | 0.321 ± 0.044 | 1.1598 |
|                |         | para-Fe <sup>3+</sup> |             | 11.50 ± 0.24 | 0.344 ± 0.016 | 2.039 ± 0.034 | 0.151 ± 0.031 |        |
|                |         | para-Fe <sup>2+</sup> |             | 56.90 ± 0.30 | 1.120 ± 0.010 | 2.628 ± 0.020 | 0.162 ± 0.011 |        |
| F <sub>7</sub> | TMS06   | para-Fe <sup>3+</sup> | Fault gouge | 23.00 ± 0.13 | 0.428 ± 0.071 | 1.090 ± 0.022 | 0.290 ± 0.100 | 1.2902 |
|                |         | para-Fe <sup>3+</sup> |             | 21.10 ± 0.11 | 0.352 ± 0.029 | 0.555 ± 0.070 | 0.174 ± 0.055 |        |
|                |         | para-Fe <sup>2+</sup> |             | 53.20 ± 0.18 | 1.135 ± 0.007 | 2.619 ± 0.015 | 0.169 ± 0.007 |        |
|                | TMS07   | para-Fe <sup>3+</sup> | Fault gouge | 24.00 ± 0.25 | 0.374 ± 0.053 | 1.010 ± 0.051 | 0.366 ± 0.081 | 1.1367 |
|                |         | para-Fe <sup>3+</sup> |             | 22.80 ± 0.23 | 0.370 ± 0.016 | 0.599 ± 0.066 | 0.187 ± 0.073 |        |
|                |         | para-Fe <sup>2+</sup> |             | 50.40 ± 0.18 | 1.126 ± 0.005 | 2.618 ± 0.010 | 0.176 ± 0.008 |        |
|                | TMS08   | para-Fe <sup>3+</sup> | Host rock   | 12.40 ± 0.21 | 0.332 ± 0.016 | 2.006 ± 0.033 | 0.154 ± 0.028 | 1.0100 |
|                |         | para-Fe <sup>3+</sup> |             | 37.20 ± 0.21 | 0.363 ± 0.014 | 0.651 ± 0.025 | 0.252 ± 0.022 |        |

Note: para-Fe<sup>3+</sup>- paramagnetic ferric iron, para-Fe<sup>2+</sup>- paramagnetic ferrous iron, mag-Fe<sup>3+</sup>- iron in magnetite, pyr-Fe<sup>2+</sup>- ferrous iron in pyrite, IS- isomer shift; QS- quadruple splitting; HW- half width; Hi- hyperfine interactions.

**Table S5.** Micro morphological classification and relative chronology of quartz in fault gouge.

| Structure          | Fracture           |                       | Denudation            |                   |               |         |       |
|--------------------|--------------------|-----------------------|-----------------------|-------------------|---------------|---------|-------|
|                    | Ru/ I <sub>0</sub> | I a                   | I b                   | I c               | II            | III     | IV    |
| Conchoidal-like    | —————              |                       |                       |                   |               |         |       |
| Subconchoidal-like |                    | —————                 | .....                 |                   |               |         |       |
| Orange peel-like   |                    |                       | .....                 | —————             |               |         |       |
| Squamous-like      |                    |                       |                       |                   | —————         |         |       |
| Mossy-like         |                    |                       |                       |                   | —————         | .....   |       |
| Stalactitic-like   |                    |                       |                       |                   |               | —————   |       |
| Worm hole-like     |                    |                       |                       |                   |               | —————   | ..... |
| Pothole-like       |                    |                       |                       |                   |               |         | ————— |
| Cniandai oral-like |                    |                       |                       |                   |               |         | ————— |
| Age                | Holocene           | Late Pleisto-<br>cene | Middle<br>Pleistocene | Early Pleistocene | Pliocene      | Miocene |       |
|                    |                    | 0.01                  |                       | 1                 | 10 (Ma)       |         |       |
| Notes:             |                    | —————                 | Strong activity       | .....             | Weak activity |         |       |

**Table S6.** Micro morphology type and formation age of quartz grains in fault gouge.

| Sample Number | Fracture           | Denudation       |                    |                   |               |          |         | Fault Name     |
|---------------|--------------------|------------------|--------------------|-------------------|---------------|----------|---------|----------------|
|               | Ru/ I <sub>0</sub> | I a              | I b                | I c               | II            | III      | IV      |                |
| TMS01         |                    | ————             | .....              | .....             | ————          | ————     | .....   | F <sub>2</sub> |
| TMS04         |                    | ————             | .....              | ————              | ————          | ————     | .....   |                |
| TMS06         |                    | ————             | .....              | .....             | .....         | ————     | .....   | F <sub>7</sub> |
| TMS07         |                    | ————             | ————               | ————              | ————          | .....    | .....   |                |
| Age           | Holocene           | Late Pleistocene | Middle Pleistocene | Early Pleistocene |               | Pliocene | Miocene |                |
|               |                    | 0.01             |                    | 1                 |               | 10 (Ma)  |         |                |
| Notes:        |                    | ————             | Strong activity    | .....             | Weak activity |          |         |                |
